# Supplementary material for: The Effect of Soil-Climate Conditions, Farmyard Manure and Mineral Fertilizers on Potato Yield and Soil Chemical Parameters
Source: MDPI journal article supplement (doi:10.3390/plants10112473), 2021-11-16
Supplement: s1 [file s1]

**Table S1.** The average monthly sum of precipitation (mm) in Caslav, Ivanovice and Lukavec in comparison with the climate normal (1981 – 2010).

|                  | April             | May  | June                       | July  | August | September | Sum   |
|------------------|-------------------|------|----------------------------|-------|--------|-----------|-------|
| <b>Caslav</b>    |                   |      |                            |       |        |           |       |
| Normal           | 35.6              | 68.8 | 67.7                       | 92.9  | 78.5   | 54.2      | 397.7 |
| 2016             | 19.4              | 35.2 | 69.0                       | 84.8  | 33.7   | 8.1       | 250.2 |
| 2017             | 86.9              | 39.5 | 80.0                       | 100.8 | 97.3   | 48.6      | 453.1 |
| 2018             | 13.0              | 33.6 | 47.3                       | 15.2  | 24.2   | 36.3      | 169.6 |
| 2019             | 26.3              | 85.0 | 23.4                       | 65.6  | 65.1   | 39.4      | 304.8 |
| <b>Ivanovice</b> |                   |      |                            |       |        |           |       |
| Normal           | 31.9              | 67.8 | 75.7                       | 71.3  | 65.6   | 52.0      | 364.3 |
| 2016             | 48.9              | 36.6 | 28.0                       | 108.8 | 42.7   | 14.3      | 279.3 |
| 2017             | 43.2              | 25.6 | 41.6                       | 73.9  | 35.1   | 72.2      | 291.6 |
| 2018             | 20.0              | 27.2 | 52.0                       | 42.6  | 21.4   | 65.3      | 228.5 |
| 2019             | 18.2              | 85.5 | 186.9                      | 84.1  | 85.4   | 79.1      | 539.2 |
| <b>Lukavec</b>   |                   |      |                            |       |        |           |       |
| Normal           | 45.1              | 63.7 | 78.5                       | 93.4  | 88.1   | 58.3      | 427.0 |
| 2016             | 32.0              | 89.3 | 58.4                       | 110.5 | 22.8   | 16.4      | 329.4 |
| 2017             | 102.1             | 33.0 | 66.0                       | 135.4 | 67.1   | 35.0      | 438.6 |
| 2018             | 7.2               | 51.5 | 65.7                       | 43.6  | 38.9   | 78.3      | 285.2 |
| 2019             | 16.8              | 96.6 | 39.2                       | 94.0  | 62.2   | 35.9      | 344.7 |
| Above normal     | Very above normal |      | Extraordinary above normal |       |        |           |       |
| Below normal     | Very below normal |      | Extraordinary below normal |       |        |           |       |

**Table S2.** The average monthly temperatures (°C) in Caslav, Ivanovice and Lukavec in comparison with the climate normal (1981 – 2010).

|                  | April             | May  | June                       | July | August | September | Mean |
|------------------|-------------------|------|----------------------------|------|--------|-----------|------|
| <b>Caslav</b>    |                   |      |                            |      |        |           |      |
| Normal           | 9.4               | 14.6 | 17.3                       | 19.3 | 18.8   | 14.4      | 15.7 |
| 2016             | 8.5               | 14.2 | 17.8                       | 19.4 | 17.8   | 16.8      | 15.8 |
| 2017             | 8.4               | 14.8 | 18.5                       | 19.2 | 19.4   | 12.5      | 15.5 |
| 2018             | 13.3              | 17.1 | 18.6                       | 20.9 | 21.9   | 15.2      | 17.8 |
| 2019             | 10.2              | 11.9 | 21.4                       | 19.5 | 19.8   | 14.3      | 16.2 |
| <b>Ivanovice</b> |                   |      |                            |      |        |           |      |
| Normal           | 9.6               | 14.8 | 17.6                       | 19.7 | 19.2   | 14.4      | 15.9 |
| 2016             | 8.9               | 14.7 | 19.0                       | 20.3 | 18.9   | 17.1      | 16.5 |
| 2017             | 8.6               | 15.2 | 20.2                       | 20.6 | 21.3   | 13.8      | 16.6 |
| 2018             | 14.5              | 18.0 | 19.5                       | 21.5 | 23.0   | 16.3      | 18.8 |
| 2019             | 11.1              | 12.4 | 22.0                       | 20.0 | 20.9   | 15.0      | 16.9 |
| <b>Lukavec</b>   |                   |      |                            |      |        |           |      |
| Normal           | 7.6               | 12.9 | 15.6                       | 17.6 | 17.1   | 12.7      | 13.9 |
| 2016             | 6.9               | 12.2 | 16.3                       | 17.9 | 16.6   | 15.3      | 14.2 |
| 2017             | 5.8               | 13.0 | 17.4                       | 17.8 | 18.5   | 11.0      | 13.9 |
| 2018             | 12.2              | 15.0 | 16.5                       | 18.7 | 20.3   | 14.2      | 16.2 |
| 2019             | 8.1               | 9.5  | 20.1                       | 17.4 | 18.5   | 13.3      | 14.5 |
| Above normal     | Very above normal |      | Extraordinary above normal |      |        |           |      |
| Below normal     | Very below normal |      |                            |      |        |           |      |
